# Supplementary material for: Analysis of the Complete Open Reading Frame of Genotype 2b Hepatitis C Virus in Association with the Response to Peginterferon and Ribavirin Therapy
Source: PLoS One. 2011 Sep 15;6(9):e24514. doi: 10.1371/journal.pone.0024514 (PMC3174186; doi:10.1371/journal.pone.0024514)
Supplement: Table S6 — PCR Primer List. Primers designed to perform two-step nested PCR for this study are listed. Dominant genotype-2b HCV full open reading frame sequences was determined by the 24 partially overlapping amplicons amplified by these primers. (XLS) [file pone.0024514.s006.xls]

## Sheet: Table S6
Amplified fragments	1st primers	sequence	2nd primers	sequence
1 nucleotides 1-524, amino acids(aa) 1-61	sense primer (S)	GCCCGCCCCCTGATGGGGGCGACACT	S	TGTAAAACGACGGCCAGT CCGCCATGAATCACTCCCCTGTG
	antisense primer (AS)	TTTCCCCAGGACTTGCCGGTGGAGCG	AS	CAGGAAACAGCTATGACC CCGATCTTTCGGGATGGGCTGGCG
2 nucleotides 477-938, aa 46-199	sense primer	CAGATCGTTGGCGGAGTTTACTTG	S	TGTAAAACGACGGCCAGT CTGCCGCGCAGGGGCCCCAGGTTGGG
	antisense primer	AGCTGCCAGGTGATGCTGTTGTT(T/C)GA	AS	CAGGAAACAGCTATGACC GCAATCATTAGTGGC(G/A)TAGTA(G/A)CT
3 nucleotides 825-1298, aa162-319	sense primer	GGAGGCGTCGCCAGAGCTCTGGCACA(C/T)	S	TGTAAAACGACGGCCAGT GGTGTTAGGGTCCTGGAAGA(C/T)GG
	antisense primer	TAGGC(G/A)AGGATCATGGT(A/G)AGAGT(T/C)GG	AS	CAGGAAACAGCTATGACC TGACCA(A/G)CT(T/C)AGCATCATGTCCCA
4 nucleotides 1275-1700, aa312-453	sense primer	CCACAACGCCACAACTTCACCCA(A/G)	S	TGTAAAACGACGGCCAGT GAGTGCAA(C/T)TGTTCCATCTACCA(A/G)GG
	antisense primer	CCCCACCCGATGCGAAAATC(G/A)TCCAG	AS	CAGGAAACAGCTATGACC CC(T/C)(G/A)CGGCAGGAAGACAA(A/G)CGCTC
5 nucleotides 1641-2090, aa 434-583	sense primer	AATGGCAGCTGGCACATAAAC(A/C)GG	S	TGTAAAACGACGGCCAGT AC(C/T)GCCCTCAA(C/T)TGCAATGACAGC(T/C)T
	antisense primer	TTAA(C/G)ATAGGTAG(C/T)A(T/C)CTGGGTGCTT	AS	CAGGAAACAGCTATGACC CCTAAAACA(G/A)TCTGTGGGGCA(C/T)AA
6 nucleotides 2064-2558, aa 575-739	sense primer	AACGGGACTGGGTTCAC(T/C)AAGAC(A/G)	S	TGTAAAACGACGGCCAGT TGCGGAGCACCACCTTGCCGCATTAG
	antisense primer	ATGAGCTTCTCAAGCGCCGCCTC(A/G)GC	AS	CAGGAAACAGCTATGACC TTGGCCCAGTATGATGAGCATCCA
7 nucleotides 2457-2897, aa 706-852	sense primer	CTATC(T/C)ACTGG(C/T)CTATTGCACCT(C/T)	S	TGTAAAACGACGGCCAGT CACCAAAACATCGTGGACGTGCAGTA
	antisense primer	TCCAGGGGGGG(A/G)ACCCATTGCTG(G/A)A(T/C)	AS	CAGGAAACAGCTATGACC CTGGGCCTCGGCCAAGACCAGCAT
8 nucleotides 2880-3278, aa847-979	sense primer	ATATCCATCTTTACTCTTAC(T/C)CCA	S	TGTAAAACGACGGCCAGT GCATACAAGATTCTCCTGAGCCGT(T/G)C
	antisense primer	GCCACTGTCTCAGCCCCCCACAC(A/G)AT	AS	CAGGAAACAGCTATGACC GACCTTCTTCTCCATTGGGCT(A/G)AA
9 nucleotides 3252-3701, aa 971-1120	sense primer	TATGACCACCTCTCCCCT(T/C)T(A/G)TCA	S	TGTAAAACGACGGCCAGT ACTTGGGCGGCCCAGGGTTTGCGGGA
	antisense primer	ACCAGGTAGAGGTCCACGGCCCC(A/G)CA	AS	CAGGAAACAGCTATGACC GGTACAGGGGTCTAATGACTTAGT
10 nucleotides 3687-4121, aa 1116-1260	sense primer	GGACCAGTCACTCAGATGTAC(A/T)C(C/T)	S	TGTAAAACGACGGCCAGT AGCGC(G/A)GAGGGGGACCTCGTGGGATG
	antisense primer	CCGTGGGCTTTGGACATGTAGGCCCC	AS	CAGGAAACAGCTATGACC AAAACCAAG(T/C)GT(G/A)GCCGCGACAGA
11 nucleotides 4053-4544, aa 1238-1401	sense primer	CCAGCTGTGCCCCAG(A/T)CTTACCA(G/A)	S	TGTAAAACGACGGCCAGT GTGGGCTACTTGCA(T/C)GCACCAAC(G/A)GG
	antisense primer	GC(A/G)TTGACACCCATGCCCCGAAGGGC	AS	CAGGAAACAGCTATGACC GCTGCTGCGAGCTC(G/A)TCGCACTTCTT
12 nucleotides 4452-4880, aa 1371-1513	sense primer	ACGCCTCC(T/C)GGTACGGTGACAACT	S	TGTAAAACGACGGCCAGT CCCCA(C/T)AGTAACATAGAGGAGGT(G/A)GC
	antisense primer	GCTGC(C/T)CCGGCATC(A/G)TAGCACTC(G/A)CA	AS	CAGGAAACAGCTATGACC GAGCACTACGCTGTCGAACATCCC
13 nucleotides 4833-5285, aa 1498-1648	sense primer	GTCCCTCAGGACGCTGTCTCCCG(T/C)	S	TGTAAAACGACGGCCAGT AGTCAACGTAGAGGGAGAACTGG(G/A)AG
	antisense primer	ACCCATG(A/T)GCT(T/C)GTCATGA(T/C)CTCGAG	AS	CAGGAAACAGCTATGACC GTCAGC(T/C)TGCATGCACGTGGCGAT
14 nucleotides 5238-5759, aa 1633-1806	sense primer	ACTAGGCT(T/A/C)AAACCTACACTGACT	S	TGTAAAACGACGGCCAGT GGTCCTACCCCCCTCCTGTACCG(C/T)(T/C)T
	antisense primer	TG(A/G)GAGGCCAACCATCCCCCCATGAT	AS	CAGGAAACAGCTATGACC GTTCAAGAGGATGGTGGTGCTGGT
15 nucleotides 5652-6095, aa 1771-1918	sense primer	ATACAGTCATCATGGCCCAAG(C/A)T(T/C)	S	TGTAAAACGACGGCCAGT GAACAATTTTGGGCCAAACACATGTG
	antisense primer	GGGGCAAC(A/G)TGGTTTCCCCTGGA(G/A)GC	AS	CAGGAAACAGCTATGACC AAAGGCGATCAGTCTGTTCATCCA
16 nucleotides 6087-6518, aa 1916-2059	sense primer	GGAGTCATCTGTGC(A/G)GCAATC(C/T)TG	S	TGTAAAACGACGGCCAGT CGCCGCCACGTCGGCCAGGGAGAGGG
	antisense primer	GGCACGCAAGGCCCTTCTGTGTAA(C/G)(A/C)	AS	CAGGAAACAGCTATGACC ATTAATGGGGAAGGT(C/T)CCCTGCCA
17 nucleotides 6441-6890, aa 2034-2183	sense primer	AAGGGATACAGGGGTGTATGGGCT	S	TGTAAAACGACGGCCAGT GGCACGGGAGTCATGACTACTCGGTG
	antisense primer	GGGGG(A/G)GATCCCCTGGCCAA(T/C)CGCCT	AS	CAGGAAACAGCTATGACC GGCTGCCGCCTCCGCGGT(G/A)ATGTG
18 nucleotides 6858-7310, aa 2173-2323	sense primer	AATTCCTTTGTGGTCGGCTCTCAG	S	TGTAAAACGACGGCCAGT CTCCCTTGCGACCCTGAGCCGGACAC
	antisense primer	ACATTGTCCTGGGTCAGGACT(T/C)TGGC	AS	CAGGAAACAGCTATGACC GCGGCGCCTCCGAGGTGGAGGCAC
19 nucleotides 7248-7697, aa 2303-2452	sense primer	CCTCC(T/C)TGGGCCCGTCC(A/G)GA(C/A/T)TAC	S	TGTAAAACGACGGCCAGT AATCCTGTT(G/A/T)TGATCGAGACATGGAA
	antisense primer	CTCAGAGGGTTGAT(C/T)GGCAACTTCTC	AS	CAGGAAACAGCTATGACC CTCCTCGGGCCCACATGGTGTTAT
20 nucleotides 7560-8150, aa 2407-2603	sense primer	TCCTCCATGCCTCCCCTTGAGGG(A/G)	S	TGTAAAACGACGGCCAGT TGCTGCTC(C/T)ATGTCATACTCCTGGAC
	antisense primer	TGTGC(A/G)ATGTCATA(G/T/A)AGGGCCATCTT	AS	CAGGAAACAGCTATGACC CACCCTGACCCCAAGGTC(G/A)GGGTA
21 nucleotides 8067-8612, aa 2576-2757	sense primer	AACCACATCCGGTCCGTGTGGGAG	S	TGTAAAACGACGGCCAGT GACCTCCTGGAAGACCAACATAC(C/T)CC
	antisense primer	TCCTCCTCGTT(A/G)CCTTGGCTCTC(T/C)GA	AS	CAGGAAACAGCTATGACC GATGAC(A/G)ACCAGGTCGTCTCCACA
22 nucleotides 8547-8909, aa 2736-2856	sense primer	AGGCGTTGCCGCGCAAGCGG(T/C)GT(T/C)	S	TGTAAAACGACGGCCAGT TTCACCACCAGCATGGGGAA(C/T)ACCAT
	antisense primer	GAGAAGAAGTGGGTCATTATGACCAT	AS	CAGGAAACAGCTATGACC CCGGACCCAGATTGTAGGGGCGTA
23 nucleotides 8874-9239, aa 2845-2966	sense primer	AGAGACCCTACCACTCCAATC(T/A)CC	S	TGTAAAACGACGGCCAGT CGAGCTGCTTGGGAAACAGTAAGACA
	antisense primer	TCGGGCAATGGAGTGAGTTTGAGCTT	AS	CAGGAAACAGCTATGACC TGTCTTCACCGCCCAGTTGAAGAG
24 nucleotides 9192-9443, aa2951-3034	sense primer	CTTGGAGCGCCTCCCCTTAGAGCG	S	TGTAAAACGACGGCCAGT TGGAAGAGTCGGGCGCGTGCTGTGAG
	antisense primer	ATGGAGTGTAGCTAGGGTTTGCCGCT	AS	CAGGAAACAGCTATGACC ATGGAGTGTAGCTAGGGTTTGCCGCT
